# Supplementary material for: Preparation and Evaluation of Thermosensitive Liposomes Encapsulating I-125-Labeled Doxorubicin Derivatives for Auger Electron Therapy
Source: MDPI journal article supplement (doi:10.3390/molecules28041864), 2023-02-16
Supplement: s1 [file s1]

**Supporting Information**

**Preparation and Evaluation of Thermosensitive  
Liposomes Encapsulating I-125-Labeled Doxorubicin  
Derivatives for Auger Electron Therapy**

Mohamed Elsaid Nasr Elghobary <sup>1,†</sup>, Masayuki Munekane <sup>1,\*†</sup>, Kenji Mishiro <sup>2</sup>,  
Takeshi Fuchigami <sup>1</sup> and Kazuma Ogawa <sup>1,2,\*</sup>

<sup>1</sup> Graduate School of Medical Sciences, Kanazawa University,  
Kanazawa 920-1192, Japan

<sup>2</sup> Institute for Frontier Science Initiative, Kanazawa University,  
Kanazawa 920-1192, Japan

\* Correspondence: munekane@p.kanazawa-u.ac.jp (M.M.);  
kogawa@p.kanazawa-u.ac.jp (K.O.);  
Tel./Fax: +81-76-234-4461 (M.M.); +81-76-234-4460 (K.O.)

† These two authors contributed equally to this work.

## **Table of Contents**

|                                |             |
|--------------------------------|-------------|
| <b>1. HPLC analysis.....</b>   | <b>S1-2</b> |
| <b>2. Stability test .....</b> | <b>S3</b>   |
| <b>3. MTT assay .....</b>      | <b>S4</b>   |

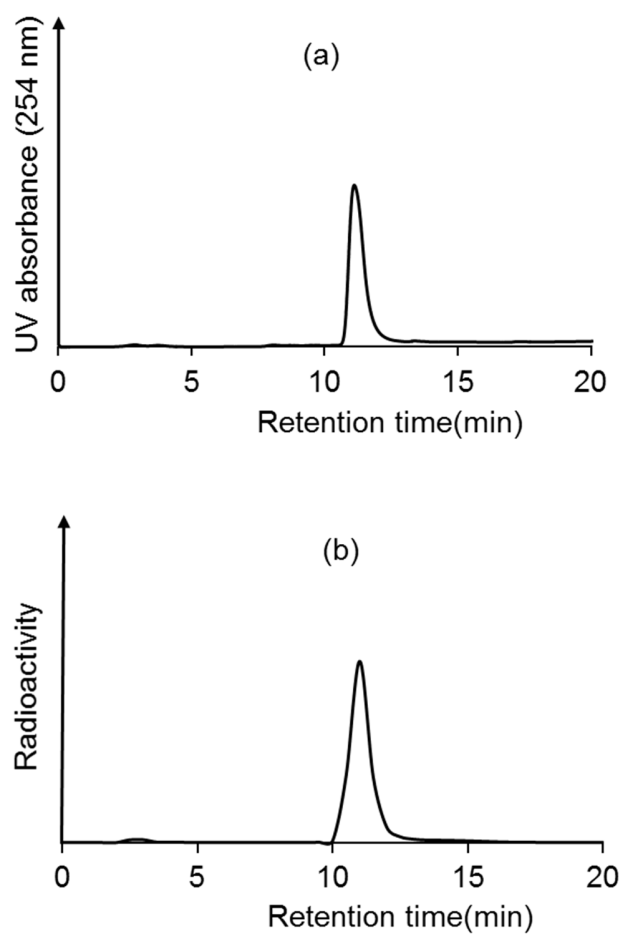

**Figure S1.** RP-HPLC chromatograms of (a) nonradioactive iodinated compound **1** and (b) radioactive compound [ $^{125}\text{I}$ ]**1**.

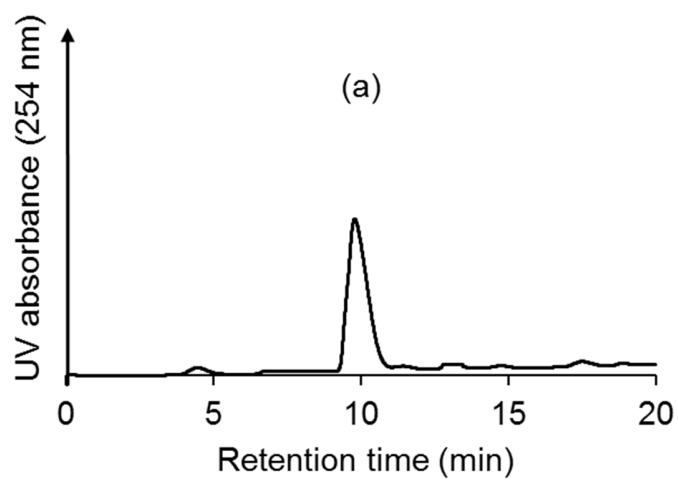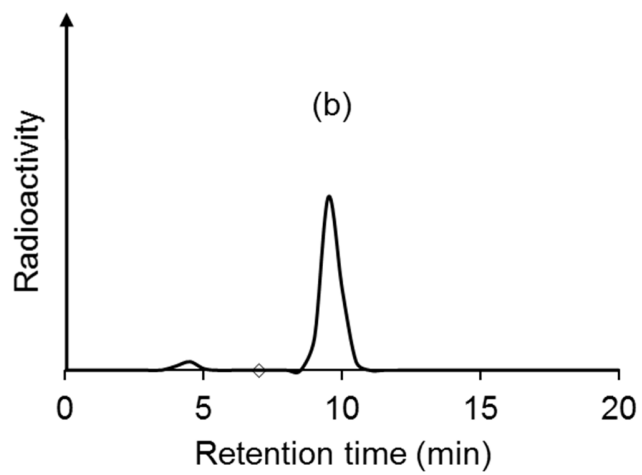

**Figure S2.** RP-HPLC chromatograms of (a) nonradioactive iodinated compound **5** and (b) radioactive compound [ $^{125}\text{I}$ ]**5**.

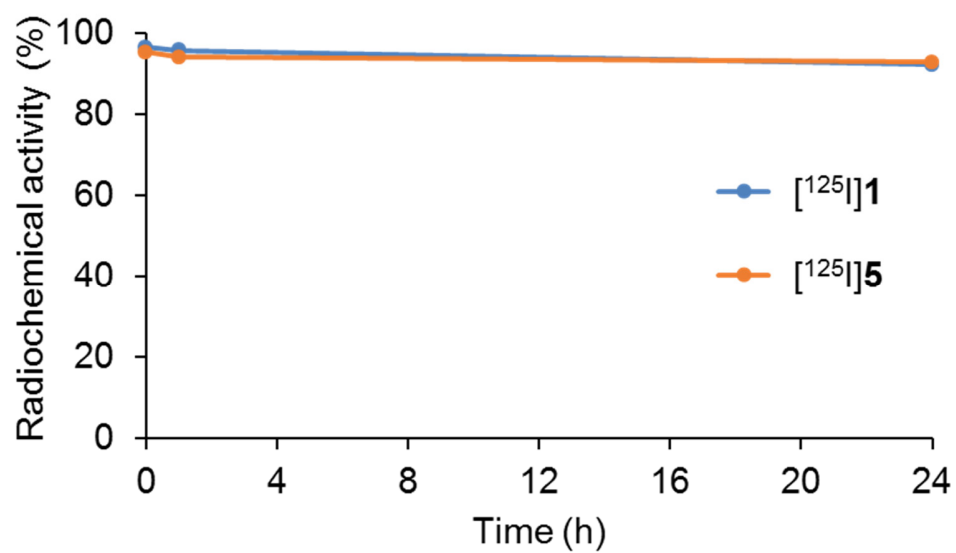

**Figure S3.** The stability of  $[^{125}\text{I}]\mathbf{1}$  and  $[^{125}\text{I}]\mathbf{5}$  in PBS.

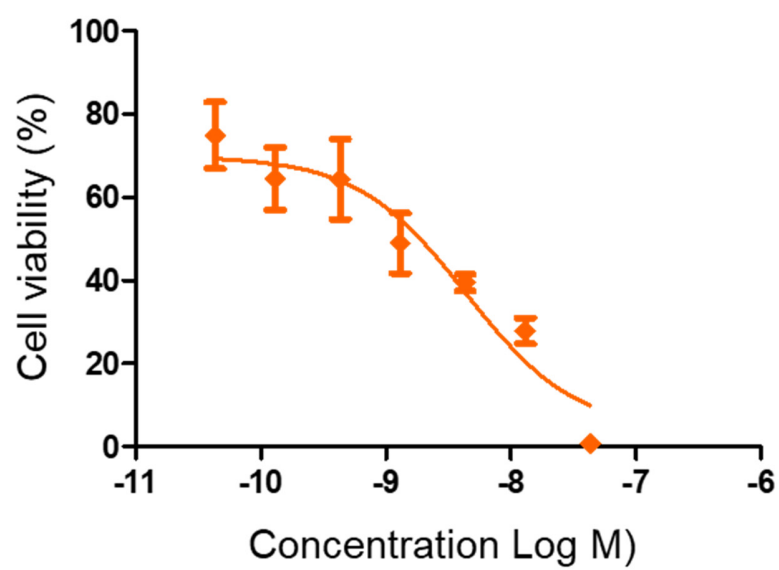

**Figure S4.** Cytotoxicity assay. The cytotoxicity of **5** toward Colon 26 cells. Data are presented as mean  $\pm$  SD for 3 samples.
